# Supplementary material for: Arsenic levels in the hair of people exposed to arsenic and awareness of its risk factors
Source: Research Square preprint supplement (doi:10.21203/rs.3.rs-4209156/v1), 2024-04-17
Supplement: Supplementary file 1 [file 1b032516ba3774e071cc430f.docx]

Supplementary Material for

**Arsenic levels in the hair of people exposed to arsenic and** **awareness of its risk factors**

Xiangping Chena, Siyu Liua, Yan Luob *

*a* School of Environmental Science and Engineering, Shaanxi University of Science & Technology, Xi’an, Shaanxi Province, 710021, P.R. China;

b Health Science Center, Xi’an Jiaotong University, Xi'an, Shaanxi Province, 710061, P.R. China.

* Corresponding author at: Health Science Center, Xi’an Jiaotong University, 76 Yanta West Road, Xi'an710061, Shaanxi Province, P.R. China.

E-mail addresses: [luoyan0904@xjtu.edu.cn](mailto:luoyan0904@xjtu.edu.cn) (Y. Luo)

The file includes: Tables: 2.

**Table S1** Results of chi-square test for demographic information in the rural Y and rural D

| Variables | | Rural Y | | Rural D | | *χ2* | *P* |
| --- | --- | --- | --- | --- | --- | --- | --- |
| n | Constituent ratio（%） | n | Constituent ratio（%） |
| Gender | |  |  |  |  | 0.718 | 0.397 |
|  | Female | 73 | 73.74 | 33 | 80.49 |  |  |
|  | Male | 26 | 26.26 | 8 | 19.51 |  |  |
| Age | |  |  |  |  | 7.251 | 0.203 |
|  | 20~30 | 3 | 3.03 |  |  |  |  |
|  | 30~40 | 8 | 8.08 |  |  |  |  |
|  | 40~50 | 14 | 14.14 | 6 | 14.63 |  |  |
|  | 50~60 | 29 | 29.29 | 9 | 21.95 |  |  |
|  | 60~70 | 25 | 25.25 | 16 | 39.02 |  |  |
|  | 70~ | 20 | 18.18 | 10 | 21.95 |  |  |
| Residence time | |  |  |  |  | 31.061 | <0.001 |
|  | ~20 | 14 | 14.14 |  |  |  |  |
|  | 20~40 | 34 | 34.34 |  |  |  |  |
|  | 40~60 | 23 | 23.23 | 15 | 36.59 |  |  |
|  | 60~ | 28 | 28.28 | 26 | 63.41 |  |  |
| Wight（kg） | |  |  |  |  | 6.597 | 0.252 |
|  | 30~40 | 2 | 2.02 | 1 | 2.44 |  |  |
|  | 40~50 | 6 | 6.06 | 3 | 7.32 |  |  |
|  | 50~60 | 40 | 40.40 | 14 | 34.15 |  |  |
|  | 60~70 | 43 | 43.43 | 16 | 39.02 |  |  |
|  | 70~80 | 6 | 6.06 | 2 | 4.88 |  |  |
|  | 80~ | 2 | 2.02 | 5 | 12.20 |  |  |
| Chronic diseases | | |  |  |  | 11.049 | 0.001 |
|  | Yes | 17 | 17.17 | 18 | 43.90 |  |  |
|  | No | 82 | 82.83 | 23 | 56.10 |  |  |

**Table S2** Results of the chi-square test for behavioral characteristics information in the rural Y and rural D

| Variables | | Rural Y | | Rural D | | *χ2* | *P* |
| --- | --- | --- | --- | --- | --- | --- | --- |
| n | Constituent ratio（%） | n | Constituent ratio（%） |
| Drinking water method | |  |  |  |  | 5.935 | 0.051 |
|  | Tap water | 66 | 66.67 | 19 | 46.34 |  |  |
|  | Barrel water/water purifier | 17 | 17.17 | 14 | 34.15 |  |  |
|  | Both | 16 | 16.16 | 8 | 19.51 |  |  |
| Drinking water intake（mL/d） | |  |  |  |  | 2.386 | 0.303 |
|  | ~1000 | 59 | 59.60 | 30 | 73.17 |  |  |
|  | 1000~2000 | 35 | 35.35 | 10 | 24.39 |  |  |
|  | 2000~3000 | 5 | 5.05 | 1 | 2.44 |  |  |
| Dietary intake（g/d） | |  |  |  |  | 7.5 | 0.112 |
|  | ~100 | 37 | 37.37 | 14 | 34.15 |  |  |
|  | 100~200 | 38 | 38.38 | 11 | 26.83 |  |  |
|  | 200~300 | 6 | 6.06 | 3 | 7.32 |  |  |
|  | 300~400 | 10 | 10.10 | 3 | 7.32 |  |  |
|  | 400 ~ | 8 | 8.08 | 10 | 24.39 |  |  |
| Bathing time（h/d） | |  |  |  |  | 20.561 | <0.001 |
|  | ~0.1 | 4 | 4.04 | 3 | 7.32 |  |  |
|  | 0.1~0.12 | 8 | 8.08 | 7 | 17.07 |  |  |
|  | 0.12~0.14 | 47 | 47.47 | 30 | 73.17 |  |  |
|  | 0.14~ | 40 | 40.40 | 1 | 2.44 |  |  |
| Smoking | |  |  |  |  | 0.699 | 0.403 |
|  | Yes | 12 | 12.12 | 3 | 7.32 |  |  |
|  | No | 87 | 87.88 | 38 | 92.68 |  |  |
| Drinking | |  |  |  |  | 1.534 | 0.215 |
|  | Yes | 8 | 8.08 | 1 | 2.44 |  |  |
|  | No | 91 | 91.92 | 40 | 97.56 |  |  |
